# Supplementary material
Source: MDPI journal article supplement (https://www.mdpi.com/2076-3417/12/15/7728)
Supplement: s1 [file s1]

Archive with 2 entries (2 files):
- applsci-1794379-supplementary.pdf
- Video S1 Interactive Use of Link Visualisation Tool.mp4
